# Supplementary material for: Antioxidant, Anti-Proliferative Activity and Chemical Fingerprinting of Centaurea calcitrapa against Breast Cancer Cells and Molecular Docking of Caspase-3
Source: MDPI journal article supplement (doi:10.3390/antiox11081514), 2022-08-03
Supplement: s1 [file s1]

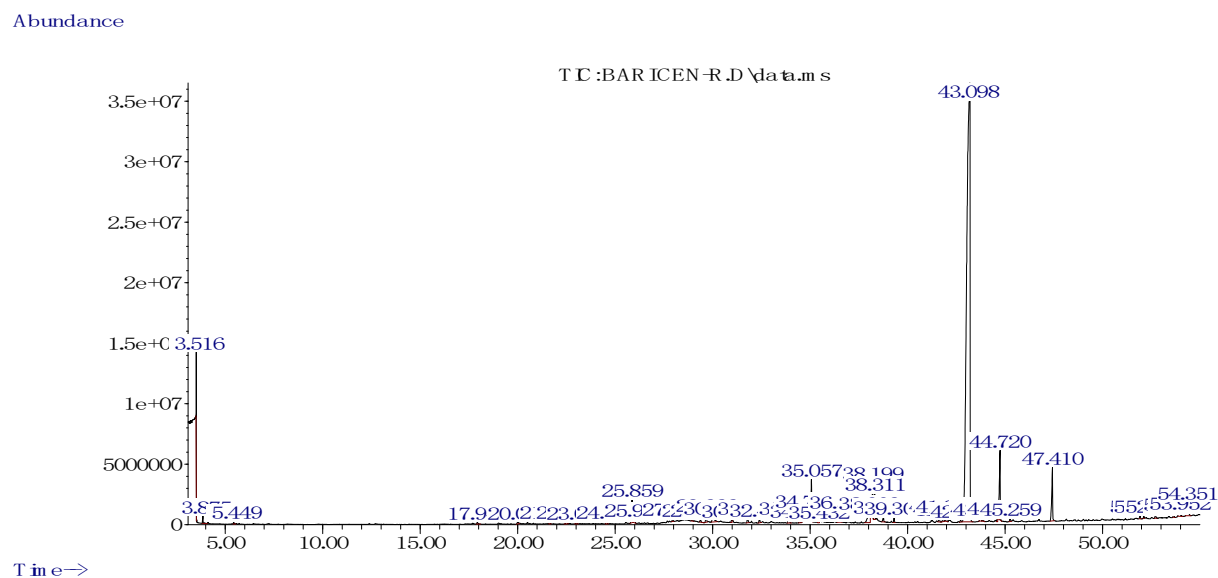

**Supplementary Figure S1.** GC-MS chromatogram showing different phytoconstituents identified in ethanolic extract of *C. calcitrapa*. Image depicts a representative chromatograph of constituents identified by GC/MS in EECC. Peaks represent absolute abundances, whereas numbers on the x-axis represent retention times in min.

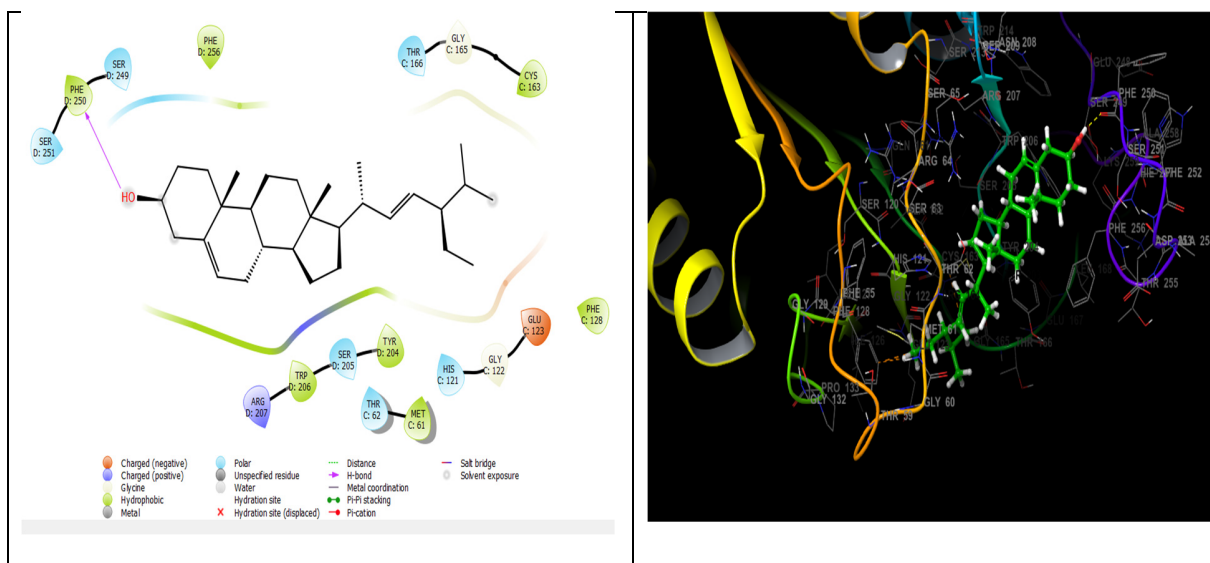

The 2D (a) and 3D (b) diagrams of the stigmasterol interactions with the active site of caspase-3 (PDB: 3GJQ)

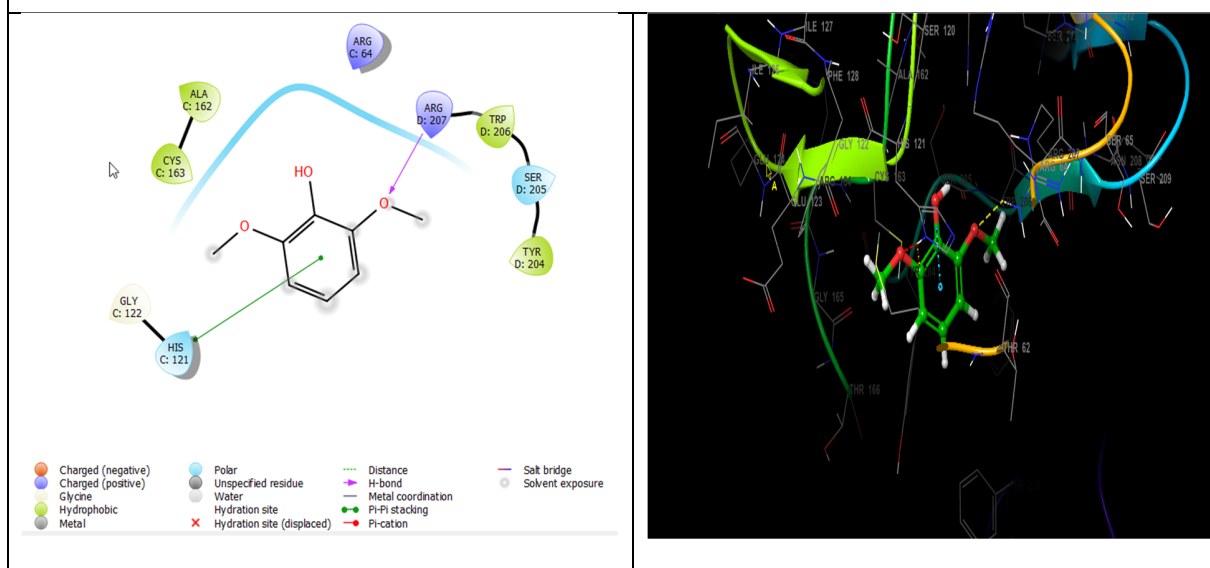

The 2D (a) and 3D (b) diagrams of the Phenol, 2,6 dimethoxy- interactions with the active site of caspase-3 (PDB: 3GJQ)

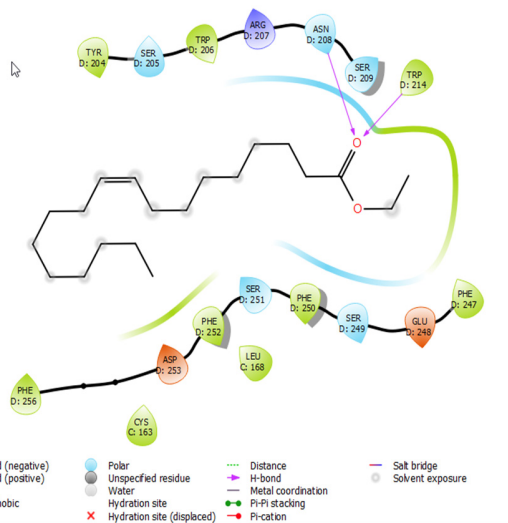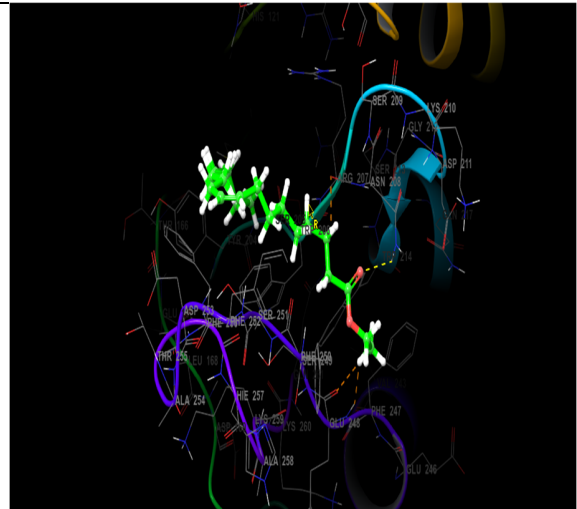

The 2D (a) and 3D (b) diagrams of the Ethyl oleate interactions with the active site of caspase-3 (PDB: 3GJQ)

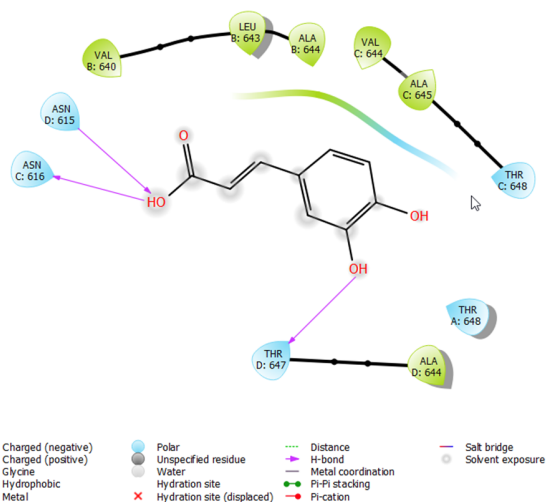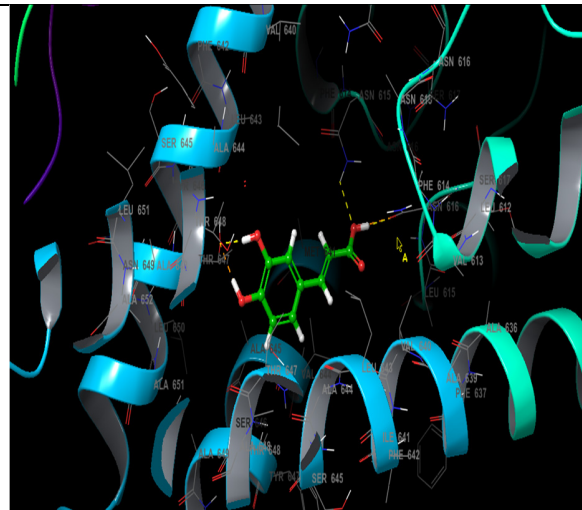

The 2D (a) and 3D (b) diagrams of the Hexadecanoic acid, ethyl ester interactions with the active site of caspase-3 (PDB: 3GJQ)

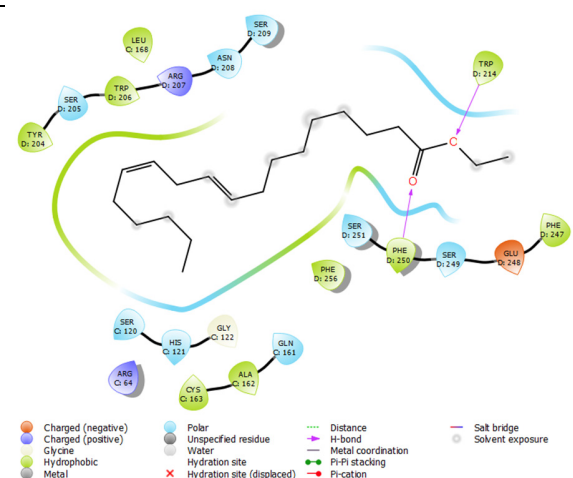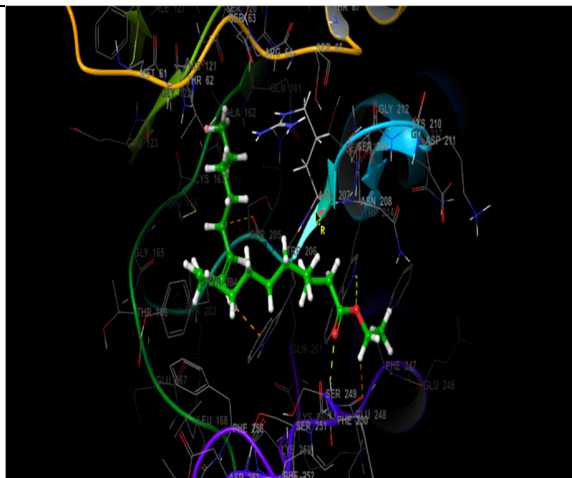

The 2D (a) and 3D (b) diagrams of the Linoleic Acid Ethyl Ester interactions with the active site of caspase-3 (PDB: 3GJQ)

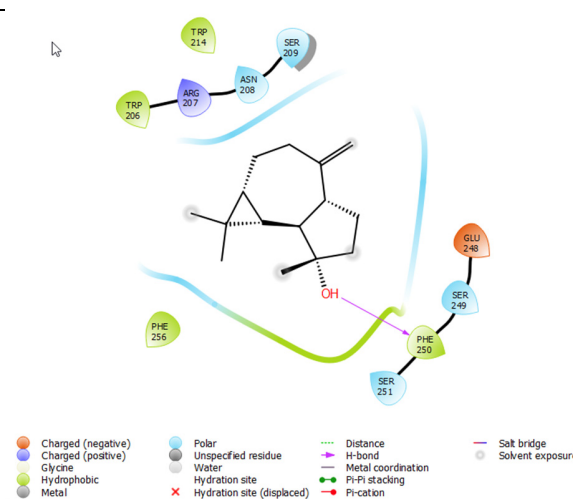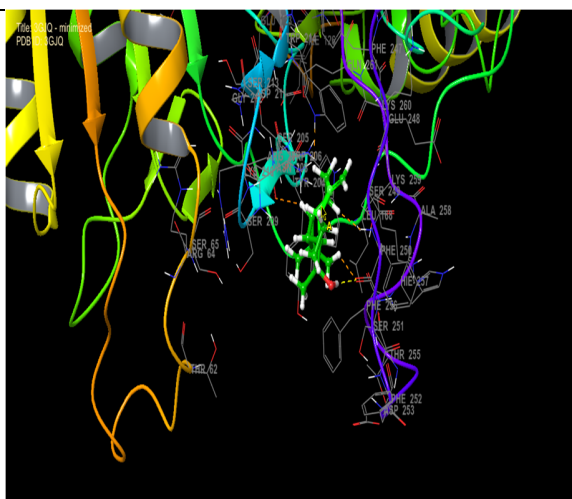

The 2D (a) and 3D (b) diagrams of the 1H-Cycloprop[e]azulen-7-ol, decahydro-1,1,7-trimethyl-4-methylene-, [1ar-(1a.alpha.,4a.alpha.,7.beta., 7a.beta.,7b.alpha.)]- interactions with the active site of caspase-3 (PDB: 3GJQ)

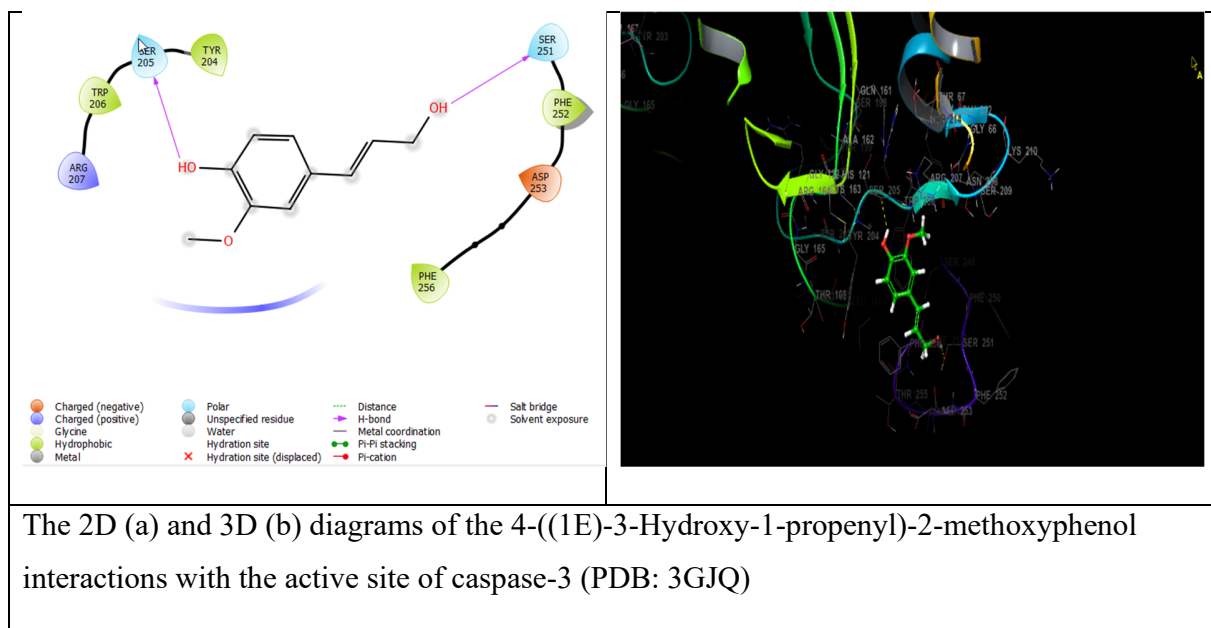

**Supplementary Figure S2.** The 2D and 3D diagrams of different polyphenolic compounds present in EECC and the active site of caspase-3.
